# Supplementary material for: The First Data on the Complete Genome of a Tetrodotoxin-Producing Bacterium
Source: MDPI journal article supplement (doi:10.3390/toxins13060410), 2021-06-09
Supplement: s1 [file s1]

# Supplementary Materials: The First Data on the Complete Genome of a Tetrodotoxin-Producing Bacterium

Daria I. Melnikova, Reindert Nijland and Timur Yu. Magarlamov

Table S1. KEGG categories of *Bacillus* sp. 1839.

| No.                     | Value | Function Description                         |
|-------------------------|-------|----------------------------------------------|
| METABOLISM              |       |                                              |
| 01100                   | 547   | Metabolic pathways                           |
| 01110                   | 254   | Biosynthesis of secondary metabolites        |
| 01120                   | 129   | Microbial metabolism in diverse environments |
| 01200                   | 81    | Carbon metabolism                            |
| 01210                   | 20    | 2-Oxocarboxylic acid metabolism              |
| 01212                   | 17    | Fatty acid metabolism                        |
| 01230                   | 104   | Biosynthesis of amino acids                  |
| 01240                   | 112   | Biosynthesis of cofactors                    |
| 01220                   | 5     | Degradation of aromatic compounds            |
| Carbohydrate metabolism |       |                                              |
| 00010                   | 31    | Glycolysis / Gluconeogenesis                 |
| 00020                   | 22    | Citrate cycle (TCA cycle)                    |
| 00030                   | 23    | Pentose phosphate pathway                    |
| 00040                   | 12    | Pentose and glucuronate interconversions     |
| 00051                   | 17    | Fructose and mannose metabolism              |
| 00052                   | 12    | Galactose metabolism                         |
| 00053                   | 6     | Ascorbate and aldarate metabolism            |
| 00500                   | 25    | Starch and sucrose metabolism                |
| 00520                   | 26    | Amino sugar and nucleotide sugar metabolism  |
| 00620                   | 33    | Pyruvate metabolism                          |
| 00630                   | 29    | Glyoxylate and dicarboxylate metabolism      |
| 00640                   | 27    | Propanoate metabolism                        |
| 00650                   | 25    | Butanoate metabolism                         |
| 00660                   | 7     | C5-Branched dibasic acid metabolism          |
| 00562                   | 4     | Inositol phosphate metabolism                |
| Energy metabolism       |       |                                              |
| 00190                   | 30    | Oxidative phosphorylation                    |
| 00195                   | 8     | Photosynthesis                               |
| 00710                   | 11    | Carbon fixation in photosynthetic organisms  |
| 00720                   | 24    | Carbon fixation pathways in prokaryotes      |
| 00680                   | 18    | Methane metabolism                           |
| 00910                   | 10    | Nitrogen metabolism                          |
| 00920                   | 11    | Sulfur metabolism                            |
| Lipid metabolism        |       |                                              |
| 00061                   | 12    | Fatty acid biosynthesis                      |
| 00071                   | 9     | Fatty acid degradation                       |
| 00072                   | 4     | Synthesis and degradation of ketone bodies   |
| 00100                   | 1     | Steroid biosynthesis                         |
| 00561                   | 9     | Glycerolipid metabolism                      |
| 00564                   | 13    | Glycerophospholipid metabolism               |
| 00600                   | 1     | Sphingolipid metabolism                      |
| 00590                   | 1     | Arachidonic acid metabolism                  |
| 00592                   | 1     | alpha-Linolenic acid metabolism              |
| Nucleotide metabolism   |       |                                              |

|                                                 |    |                                                     |
|-------------------------------------------------|----|-----------------------------------------------------|
| 00230                                           | 44 | Purine metabolism                                   |
| 00240                                           | 33 | Pyrimidine metabolism                               |
| <b>Amino acid metabolism</b>                    |    |                                                     |
| 00250                                           | 22 | Alanine, aspartate and glutamate metabolism         |
| 00260                                           | 27 | Glycine, serine and threonine metabolism            |
| 00270                                           | 35 | Cysteine and methionine metabolism                  |
| 00280                                           | 18 | Valine, leucine and isoleucine degradation          |
| 00290                                           | 11 | Valine, leucine and isoleucine biosynthesis         |
| 00300                                           | 15 | Lysine biosynthesis                                 |
| 00310                                           | 9  | Lysine degradation                                  |
| 00220                                           | 15 | Arginine biosynthesis                               |
| 00330                                           | 17 | Arginine and proline metabolism                     |
| 00340                                           | 15 | Histidine metabolism                                |
| 00350                                           | 5  | Tyrosine metabolism                                 |
| 00360                                           | 7  | Phenylalanine metabolism                            |
| 00380                                           | 7  | Tryptophan metabolism                               |
| 00400                                           | 20 | Phenylalanine, tyrosine and tryptophan biosynthesis |
| 00410                                           | 6  | beta-Alanine metabolism                             |
| 00430                                           | 6  | Taurine and hypotaurine metabolism                  |
| 00450                                           | 8  | Selenocompound metabolism                           |
| 00460                                           | 5  | Cyanoamino acid metabolism                          |
| 00471                                           | 4  | D-Glutamine and D-glutamate metabolism              |
| 00472                                           | 1  | D-Arginine and D-ornithine metabolism               |
| 00473                                           | 3  | D-Alanine metabolism                                |
| 00480                                           | 8  | Glutathione metabolism                              |
| <b>Glycan biosynthesis and metabolism</b>       |    |                                                     |
| 00531                                           | 2  | Glycosaminoglycan degradation                       |
| 00540                                           | 1  | Lipopolysaccharide biosynthesis                     |
| 00541                                           | 9  | O-Antigen nucleotide sugar biosynthesis             |
| 00550                                           | 24 | Peptidoglycan biosynthesis                          |
| 00511                                           | 1  | Other glycan degradation                            |
| 00572                                           | 1  | Arabinogalactan biosynthesis - Mycobacterium        |
| <b>Metabolism of cofactors and vitamins</b>     |    |                                                     |
| 00730                                           | 15 | Thiamine metabolism                                 |
| 00740                                           | 7  | Riboflavin metabolism                               |
| 00750                                           | 5  | Vitamin B6 metabolism                               |
| 00760                                           | 9  | Nicotinate and nicotinamide metabolism              |
| 00770                                           | 16 | Pantothenate and CoA biosynthesis                   |
| 00780                                           | 5  | Biotin metabolism                                   |
| 00785                                           | 4  | Lipoic acid metabolism                              |
| 00790                                           | 21 | Folate biosynthesis                                 |
| 00670                                           | 11 | One carbon pool by folate                           |
| 00830                                           | 1  | Retinol metabolism                                  |
| 00860                                           | 19 | Porphyrin and chlorophyll metabolism                |
| 00130                                           | 10 | Ubiquinone and other terpenoid-quinone biosynthesis |
| <b>Metabolism of terpenoids and polyketides</b> |    |                                                     |
| 00900                                           | 13 | Terpenoid backbone biosynthesis                     |
| 00909                                           | 1  | Sesquiterpenoid and triterpenoid biosynthesis       |
| 00906                                           | 5  | Carotenoid biosynthesis                             |
| 00981                                           | 1  | Insect hormone biosynthesis                         |
| 00908                                           | 1  | Zeatin biosynthesis                                 |
| 00903                                           | 1  | Limonene and pinene degradation                     |
| 00281                                           | 2  | Geraniol degradation                                |
| 01051                                           | 1  | Biosynthesis of ansamycins                          |
| 00523                                           | 1  | Polyketide sugar unit biosynthesis                  |

|       |    |                                                         |
|-------|----|---------------------------------------------------------|
| 01054 | 1  | Nonribosomal peptide structures                         |
| 01053 | 1  | Biosynthesis of siderophore group nonribosomal peptides |
|       |    | <b>Biosynthesis of other secondary metabolites</b>      |
| 00940 | 1  | Phenylpropanoid biosynthesis                            |
| 00950 | 1  | Isoquinoline alkaloid biosynthesis                      |
| 00960 | 2  | Tropane, piperidine and pyridine alkaloid biosynthesis  |
| 00966 | 2  | Glucosinolate biosynthesis                              |
| 00311 | 1  | Penicillin and cephalosporin biosynthesis               |
| 00261 | 4  | Monobactam biosynthesis                                 |
| 00521 | 4  | Streptomycin biosynthesis                               |
| 00524 | 1  | Neomycin, kanamycin and gentamicin biosynthesis         |
| 00401 | 3  | Novobiocin biosynthesis                                 |
| 00405 | 2  | Phenazine biosynthesis                                  |
| 00333 | 3  | Prodigiosin biosynthesis                                |
| 00998 | 1  | Biosynthesis of various secondary metabolites - part 2  |
|       |    | <b>Xenobiotics biodegradation and metabolism</b>        |
| 00362 | 7  | Benzoate degradation                                    |
| 00627 | 4  | Aminobenzoate degradation                               |
| 00625 | 3  | Chloroalkane and chloroalkene degradation               |
| 00361 | 1  | Chlorocyclohexane and chlorobenzene degradation         |
| 00622 | 2  | Xylene degradation                                      |
| 00642 | 1  | Ethylbenzene degradation                                |
| 00643 | 2  | Styrene degradation                                     |
| 00621 | 1  | Dioxin degradation                                      |
| 00626 | 2  | Naphthalene degradation                                 |
| 00980 | 1  | Metabolism of xenobiotics by cytochrome P450            |
| 00982 | 1  | Drug metabolism - cytochrome P450                       |
| 00983 | 7  | Drug metabolism - other enzymes                         |
|       |    | <b>GENETIC INFORMATION PROCESSING</b>                   |
|       |    | <b>Transcription</b>                                    |
| 03020 | 5  | RNA polymerase                                          |
|       |    | <b>Translation</b>                                      |
| 03010 | 55 | Ribosome                                                |
| 00970 | 27 | Aminoacyl-tRNA biosynthesis                             |
| 03013 | 2  | RNA transport                                           |
| 03008 | 1  | Ribosome biogenesis in eukaryotes                       |
|       |    | <b>Folding, sorting and degradation</b>                 |
| 03060 | 14 | Protein export                                          |
| 04141 | 2  | Protein processing in endoplasmic reticulum             |
| 04122 | 12 | Sulfur relay system                                     |
| 03018 | 13 | RNA degradation                                         |
|       |    | <b>Replication and repair</b>                           |
| 03030 | 15 | DNA replication                                         |
| 03410 | 12 | Base excision repair                                    |
| 03420 | 7  | Nucleotide excision repair                              |
| 03430 | 16 | Mismatch repair                                         |
| 03440 | 19 | Homologous recombination                                |
| 03450 | 2  | Non-homologous end-joining                              |
|       |    | <b>ENVIRONMENTAL INFORMATION PROCESSING</b>             |
|       |    | <b>Membrane transport</b>                               |
| 02010 | 90 | ABC transporters                                        |
| 02060 | 22 | Phosphotransferase system (PTS)                         |
| 03070 | 12 | Bacterial secretion system                              |
|       |    | <b>Signal transduction</b>                              |
| 02020 | 91 | Two-component system                                    |

|                                         |    |                                                 |
|-----------------------------------------|----|-------------------------------------------------|
| 04013                                   | 1  | MAPK signaling pathway - fly                    |
| 04016                                   | 3  | MAPK signaling pathway - plant                  |
| 04011                                   | 1  | MAPK signaling pathway - yeast                  |
| 04066                                   | 7  | HIF-1 signaling pathway                         |
| 04068                                   | 2  | FoxO signaling pathway                          |
| 04070                                   | 2  | Phosphatidylinositol signaling system           |
| 04151                                   | 1  | PI3K-Akt signaling pathway                      |
| 04152                                   | 1  | AMPK signaling pathway                          |
| <b>CELLULAR PROCESSES</b>               |    |                                                 |
| <b>Transport and catabolism</b>         |    |                                                 |
| 04142                                   | 3  | Lysosome                                        |
| 04146                                   | 7  | Peroxisome                                      |
| 04138                                   | 1  | Autophagy - yeast                               |
| <b>Cell growth and death</b>            |    |                                                 |
| 04112                                   | 11 | Cell cycle - Caulobacter                        |
| 04216                                   | 2  | Ferroptosis                                     |
| 04217                                   | 3  | Necroptosis                                     |
| <b>Cellular community - prokaryotes</b> |    |                                                 |
| 02024                                   | 35 | Quorum sensing                                  |
| 05111                                   | 11 | Biofilm formation - Vibrio cholerae             |
| 02025                                   | 7  | Biofilm formation - Pseudomonas aeruginosa      |
| 02026                                   | 9  | Biofilm formation - Escherichia coli            |
| <b>Cell motility</b>                    |    |                                                 |
| 02030                                   | 15 | Bacterial chemotaxis                            |
| 02040                                   | 34 | Flagellar assembly                              |
| <b>OTHERS</b>                           |    |                                                 |
| 04621                                   | 3  | NOD-like receptor signaling pathway             |
| 04612                                   | 1  | Antigen processing and presentation             |
| 04659                                   | 1  | Th17 cell differentiation                       |
| 04657                                   | 1  | IL-17 signaling pathway                         |
| 04910                                   | 2  | Insulin signaling pathway                       |
| 04922                                   | 7  | Glucagon signaling pathway                      |
| 04920                                   | 1  | Adipocytokine signaling pathway                 |
| 03320                                   | 2  | PPAR signaling pathway                          |
| 04915                                   | 1  | Estrogen signaling pathway                      |
| 04914                                   | 1  | Progesterone-mediated oocyte maturation         |
| 04918                                   | 1  | Thyroid hormone synthesis                       |
| 04919                                   | 1  | Thyroid hormone signaling pathway               |
| 04975                                   | 1  | Fat digestion and absorption                    |
| 04978                                   | 2  | Mineral absorption                              |
| 04724                                   | 1  | Glutamatergic synapse                           |
| 04727                                   | 1  | GABAergic synapse                               |
| 04211                                   | 2  | Longevity regulating pathway                    |
| 04212                                   | 5  | Longevity regulating pathway - worm             |
| 04213                                   | 4  | Longevity regulating pathway - multiple species |
| 04714                                   | 3  | Thermogenesis                                   |
| 04626                                   | 4  | Plant-pathogen interaction                      |
| 05200                                   | 2  | Pathways in cancer                              |
| 05206                                   | 1  | MicroRNAs in cancer                             |
| 05205                                   | 1  | Proteoglycans in cancer                         |
| 05204                                   | 1  | Chemical carcinogenesis                         |
| 05203                                   | 1  | Viral carcinogenesis                            |
| 05230                                   | 8  | Central carbon metabolism in cancer             |
| 05211                                   | 1  | Renal cell carcinoma                            |
| 05215                                   | 1  | Prostate cancer                                 |

|       |    |                                                            |
|-------|----|------------------------------------------------------------|
| 05340 | 1  | Primary immunodeficiency                                   |
| 05010 | 1  | Alzheimer disease                                          |
| 05012 | 1  | Parkinson disease                                          |
| 05014 | 3  | Amyotrophic lateral sclerosis                              |
| 05016 | 3  | Huntington disease                                         |
| 05020 | 1  | Prion disease                                              |
| 05022 | 3  | Pathways of neurodegeneration - multiple diseases          |
| 05418 | 3  | Fluid shear stress and atherosclerosis                     |
| 04930 | 1  | Type II diabetes mellitus                                  |
| 04940 | 1  | Type I diabetes mellitus                                   |
| 04931 | 2  | Insulin resistance                                         |
| 04934 | 1  | Cushing syndrome                                           |
| 05120 | 1  | Epithelial cell signaling in Helicobacter pylori infection |
| 05130 | 1  | Pathogenic Escherichia coli infection                      |
| 05132 | 4  | Salmonella infection                                       |
| 05131 | 1  | Shigellosis                                                |
| 05134 | 4  | Legionellosis                                              |
| 05150 | 1  | Staphylococcus aureus infection                            |
| 05152 | 3  | Tuberculosis                                               |
| 05165 | 1  | Human papillomavirus infection                             |
| 05146 | 2  | Amoebiasis                                                 |
| 05143 | 1  | African trypanosomiasis                                    |
| 01501 | 11 | beta-Lactam resistance                                     |
| 01502 | 12 | Vancomycin resistance                                      |
| 01503 | 3  | Cationic antimicrobial peptide (CAMP) resistance           |
| 01524 | 1  | Platinum drug resistance                                   |
| 01523 | 4  | Antifolate resistance                                      |
